# Supplementary material
Source: PubMed Central journal article supplement (PMC3832115)
Supplement: tjp0591-2987-SD1.pdf [file tjp0591-2987-SD1.pdf]

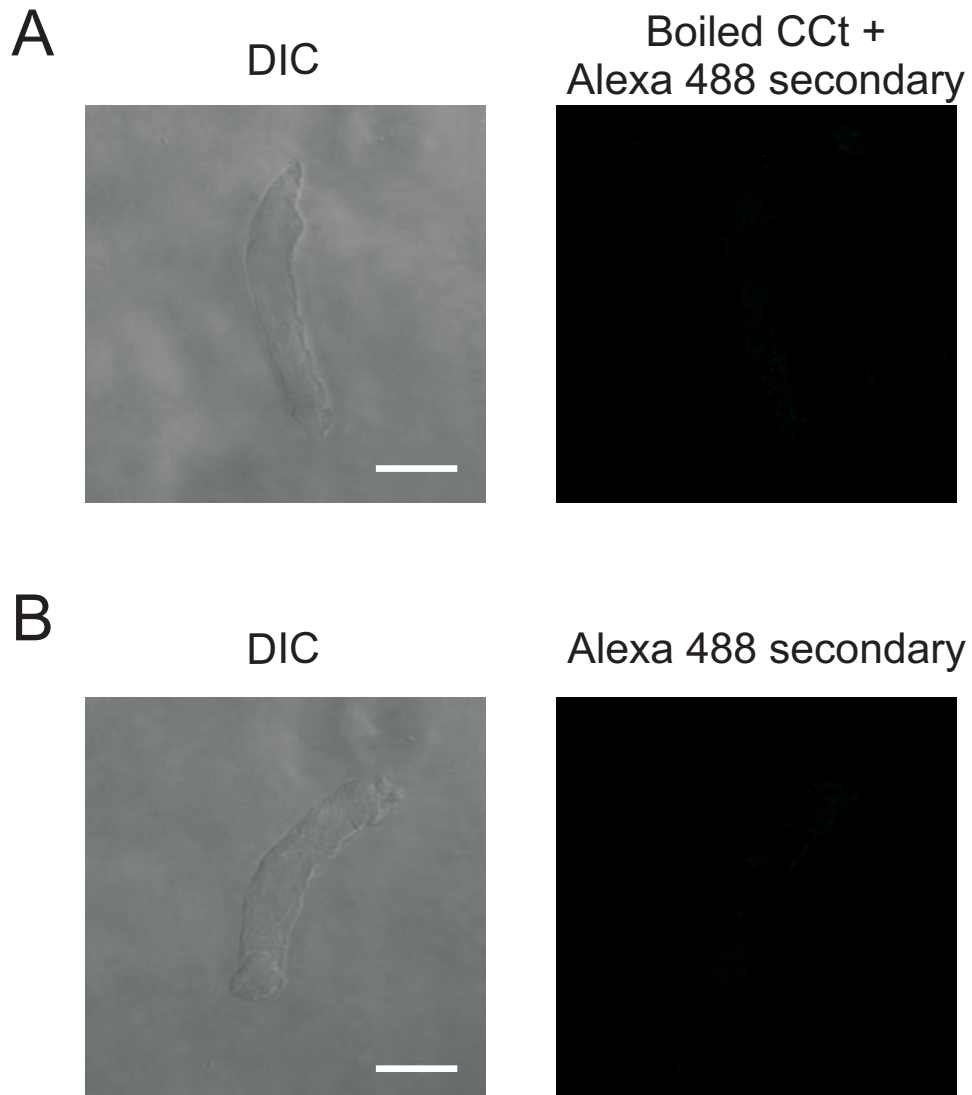

**Supplemental Figure 1. Anti-CCt antibody specifically detects CCt fragment.** A. Representative images of a smooth muscle cell with DIC and confocal image labeled with boiled anti-CCt and Alexa 488 antibodies. B. Representative images showing DIC and confocal image of the same cell labeled with Alexa 488 secondary antibodies. Scale bars are 10  $\mu\text{m}$ .
